# ANESTHESIOLOGY

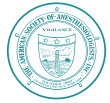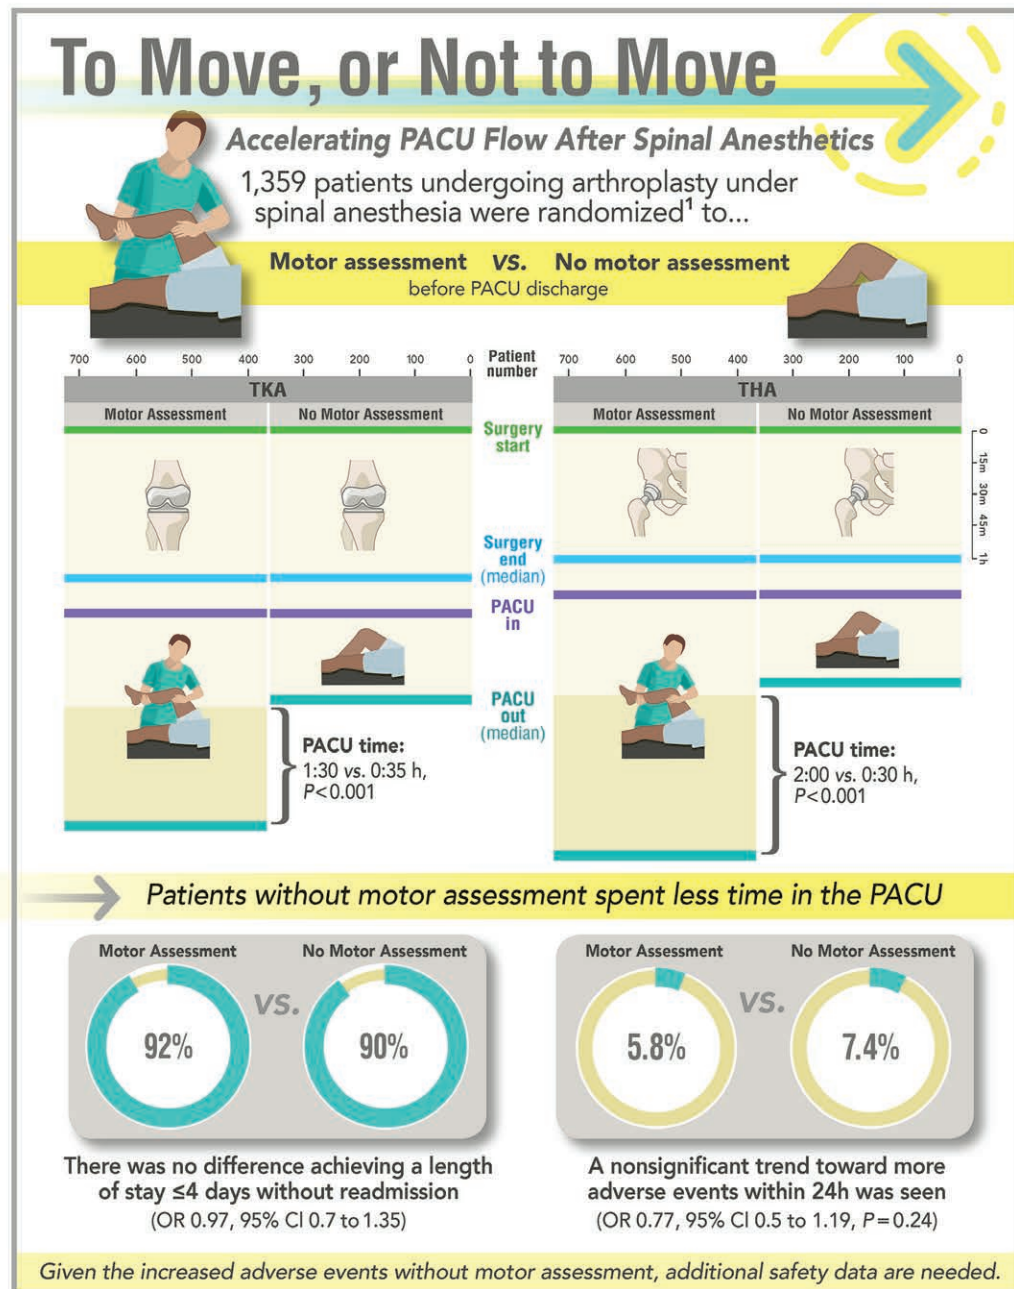

Temporal events visualized using EventFlow.<sup>2</sup> OR = odds ratio; PACU = postanesthesia care unit; THA = total hip arthroplasty; TKA = total knee arthroplasty.

Infographic created by Jonathan P. Wanderer, Vanderbilt University School of Medicine, and James P. Rathmell, Brigham and Women's Health Care/Harvard Medical School; illustration by Annemarie Johnson, Vivo Visuals. Address correspondence to Dr. Wanderer: jonathan.p.wanderer@vanderbilt.edu.

1. Aasvang EK, Jørgensen CC, Laursen MB, Madsen J, Solgaard S, Krøigaard M, Kjærsgaard-Anderson P, Mandøe H, Hansen TB, Nielsen JU, Krarup N, Skott AE, Kehlet H: Safety aspects of postanesthesia care unit discharge without motor function assessment after spinal anesthesia: A randomized, multicenter, semiblinded, noninferiority, controlled trial. *ANESTHESIOLOGY* 2017; 126:1043-52

2. Monroe M, Lan R, Lee H, Plaisant C, Shneiderman B. Temporal event sequence simplification. *IEEE Trans Vis Comput Graph* 2013; 19:2227-36
